# Supplementary material
Source: PubMed Central journal article supplement (PMC7233414)
Supplement: ry200823suppa1.pdf [file ry200823suppa1.pdf]

## عملکرد رادیولوژیست ها در افتراق پنومونی COVID-19 از پنومونی ویروسی غیر COVID-19 با استفاده از سی تی اسکن ریه

**خلاصه:** با استفاده از سی تی اسکن ریه، رادیولوژیست ها با ویژگی (Specificity) بالا ولی حساسیت (Sensitivity) متوسط پنومونی ناشی از COVID-19 را از پنومونی ویروسی غیر COVID-19 افتراق دادند.

### یافته های کلیدی:

- سه رادیولوژیست از کشور چین با حساسیت ۷۲٪، ۷۲٪ و ۹۴٪ و ویژگی ۹۴٪، ۸۸٪ و ۲۴٪ پنومونی ناشی از COVID-19 را در ۲۱۹ بیمار از پنومونی ویروسی غیر COVID-19 در ۲۰۵ افتراق دادند.
- در یک گروه تطبیق یافته (مچ شده) شامل ۵۸ بیمار، چهار رادیولوژیست از ایالات متحده آمریکا حساسیت ۹۳٪، ۸۳٪، ۷۳٪ و ۷۰٪ و ویژگی ۱۰۰٪، ۹۳٪، ۹۳٪ و ۱۰۰٪ داشتند.
- یافته های سی تی اسکن ریه که به نفع پنومونی COVID-19 در مقابل پنومونی ویروسی غیر COVID-19 بودند شامل درگیری حاشیه ای (۸۰٪ در مقابل ۵۷٪،  $P < 0.001$ )، کدورت های مات (۹۱٪ در مقابل ۶۸٪،  $P < 0.001$ ) و افزایش ضخامت عروقی (۵۸٪ در مقابل ۲۲٪،  $P < 0.001$ ) بودند.

### چکیده:

**پیش زمینه:** بر خلاف حساسیت بالا در تشخیص COVID-19 در غربالگری بیماران، یافته های سی تی اسکن ریه ها در پنومونی ناشی از COVID-19 غیر اختصاصی در نظر گرفته میشوند.

**هدف:** ارزیابی عملکرد رادیولوژیست های ایالات متحده آمریکا و چین در افتراق پنومونی ناشی از COVID-19 در مقابل پنومونی ویروسی غیر COVID-19.

**روش ها:** ۲۱۹ بیمار مبتلا به COVID-19 با RT-PCR مثبت و سی تی اسکن اینرمال ریه ها به صورت گذشته نگر از ۷ بیمارستان چینی در استان هونان کشور چین در بازه زمانی ۶ ژانویه تا ۲۰ فوریه ۲۰۲۰ شناسایی شدند. ۲۰۵ بیمار با آزمایش مثبت درگیری ویروسی راه های تنفسی و سی تی اسکن ریوی مطابق یا بسیار مشکوک به پنومونی در تفسیر اولیه رادیولوژی با فاصله زمانی ۷ روز (بین تست آزمایشگاهی و سی تی اسکن ریه) در بیمارستان رد آیلند در شهر پراویدنس، ایالت رد آیلند شناسایی شدند. سه رادیولوژیست از کشور چین به صورت ناآگاه (از علت بیماری) (تعداد=۴۲۴) را جهت

افتراق پنومونی COVID-19 از پنومونی ویروسی غیر COVID-19 مورد بررسی قرار دادند. ۵۸ بیمار تطبیق یافته از نظر سنی به صورت تصادفی انتخاب شده و توسط چهار رادیولوژیست از ایالات متحده آمریکا با روش مشابه بررسی شدند. یافته های متفاوت سی تی اسکن ثبت شده و بین دو گروه مقایسه شد.

نتایج: برای تمام سی تی اسکن های ریه (۴۲۴ بیمار)، دقت سه رادیولوژیست از کشور چین برای افتراق پنومونی ناشی از COVID-19 از پنومونی ویروسی غیر COVID-19، بدین ترتیب بود: (۳۵۰/۴۲۴) ۸۳٪، (۳۳۸/۴۲۴) ۸۰٪ و (۲۵۵/۴۲۴) ۶۰٪. در نمونه انتخاب شده به صورت تصادفی شامل ۵۸ بیمار، حساسیت سه رادیولوژیست از کشور چین و ۴ رادیولوژیست از ایالت متحده آمریکا به ترتیب ۸۰٪، ۶۷٪، ۹۷٪، ۹۳٪، ۸۳٪، ۷۳٪ و ۷۰٪ بود. ویژگی رادیولوژیست ها برای همان بیماران به ترتیب ۱۰۰٪، ۹۳٪، ۷٪، ۱۰۰٪، ۹۳٪، ۹۳٪ و ۱۰۰٪ بود. در مقایسه با پنومونی ویروسی ناشی از غیر COVID-19، پنومونی ناشی از COVID-19 بیشتر درگیری حاشیه ای (۸۰٪ در مقابل ۵۷٪،  $P < 0.001$ )، کدورت های مات (۹۱٪ در مقابل ۶۸٪،  $P < 0.001$ )، کدورت های شبکه ای ظریف (۵۶٪ در مقابل ۲۲٪،  $P < 0.001$ )، و افزایش ضخامت عروقی (۵۹٪ در مقابل ۲۲٪،  $P < 0.001$ ) داشته و کمتر درگیری مرکزی به همراه درگیری حاشیه ای (۱۴٪ در مقابل ۳۵٪،  $P < 0.001$ )، پلورال افیوژن (۴.۱٪ در مقابل ۳۹٪،  $P < 0.001$ )، یا لنفادنوپاتی (۲.۷٪ در مقابل ۱۰٪،  $P < 0.001$ ) داشته است.

نتیجه گیری: رادیولوژیست های کشور چین و ایالات متحده آمریکا با استفاده از سی تی اسکن ریه توانستند با دقت متوسط تا بالا پنومونی ناشی از COVID-19 را از پنومونی ویروسی غیر COVID-19 افتراق دهند.
